# Supplementary material
Source: PubMed Central journal article supplement (PMC8408608)
Supplement: EMBJ-40-e106887-s002.pdf [file EMBJ-40-e106887-s002.pdf]

## Expanded View Figures

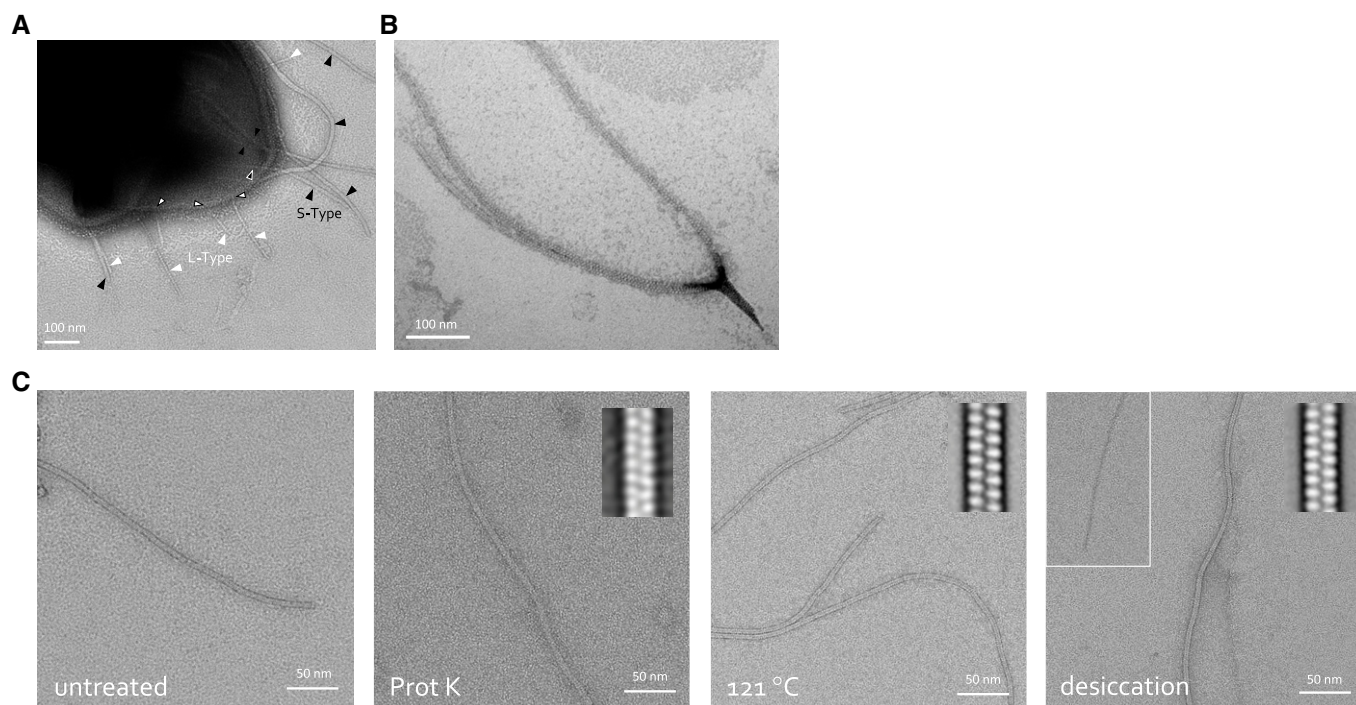

**Figure EV1. Ena morphology and robustness.**

- A, B Negative stain TEM of *B. cereus* NVH 0075-95 endospore with indication of the two Ena morphologies: S-type (black arrowheads) and L-Enas (white arrowheads) (A), and closed-up view of a dislodged S-Ena bundle splitting into individual Ena fibers (B).
- C Negative stain TEM images of isolated *ex vivo* S-Ena. To test Ena stability under different stresses, samples were treated, from left to right, with: (1) untreated control, (2) 1 h of 1 mg/ml proteinase K, (3) autoclaving (i.e., 20 min at 121°C) or (4) a 4 h of desiccation at 43°C. Inset shows 2D class averages to assess the structural integrity of the treated Ena. S-Enas are found to be resistant to Proteinase K treatment, autoclaving and desiccation at 43°C, although some fibers appear to lose subunit integrity upon desiccation (inset). Desiccation at 43°C may mimic conditions encountered by *Bacillus* spores during drought.

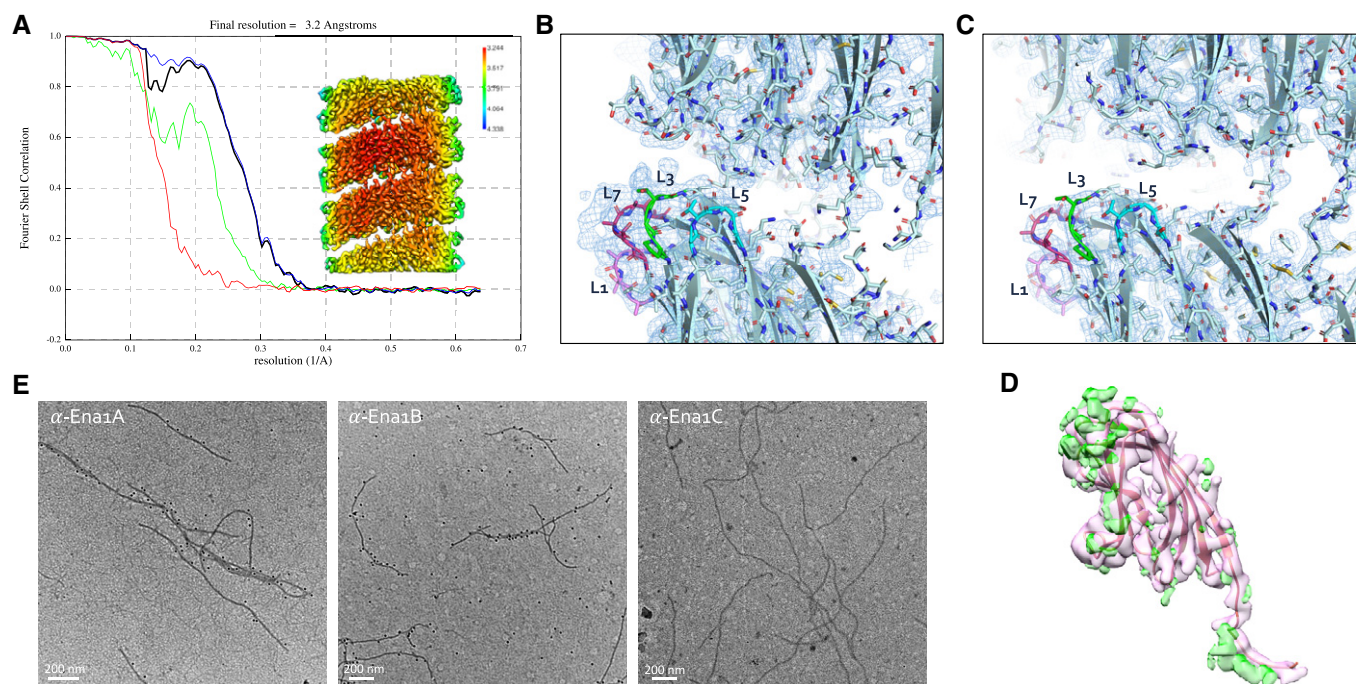

**Figure EV2. S-Ena is composed of both Ena1A and Ena1B subunits.**

- A FSC curve and local resolution heatmap (inset) of the *recEna1B* helical reconstruction, indicating a final resolution of 3.2 Å at a cutoff of 0.143. FSC curve and local resolution were calculated by postprocessing in RELION3.0 using a solvent mask consisting of 3 helical turns.
- B, C Side-by-side comparison of cryoEM maps calculated from *ex vivo* (B) and *recEna1B* filaments (C), with the refined Ena1B model docked into the maps. The *ex vivo* Ena map shows features unaccounted for by the Ena1B model near loops 3 (L3) and 7 (L7), corresponding to regions of amino acid insertions in the Ena1A sequence (Fig EV2B).
- D *recEna1B* map (pink) and *recEna1B*—*ex vivo* Ena1 difference map (green) masked over a single Ena1B subunit and calculated by TEMPy:Diffmap (Farabella et al, 2015) from the CCPEM package (Burnley et al, 2017). Difference in both maps locates to L3, L7 and the conformation of Ntc.
- E Immunogold TEM of *ex vivo* S-Enas, stained with, from left to right, anti-Ena1A, anti-Ena1B, and anti-Ena1C sera, each with gold-labeled (10 nm colloidal gold) anti-rabbit IgG as secondary antibody. Specific staining with Ena1A and Ena1B sera confirms the presence of both subunits in native Enas. No staining was seen with Ena1C serum.

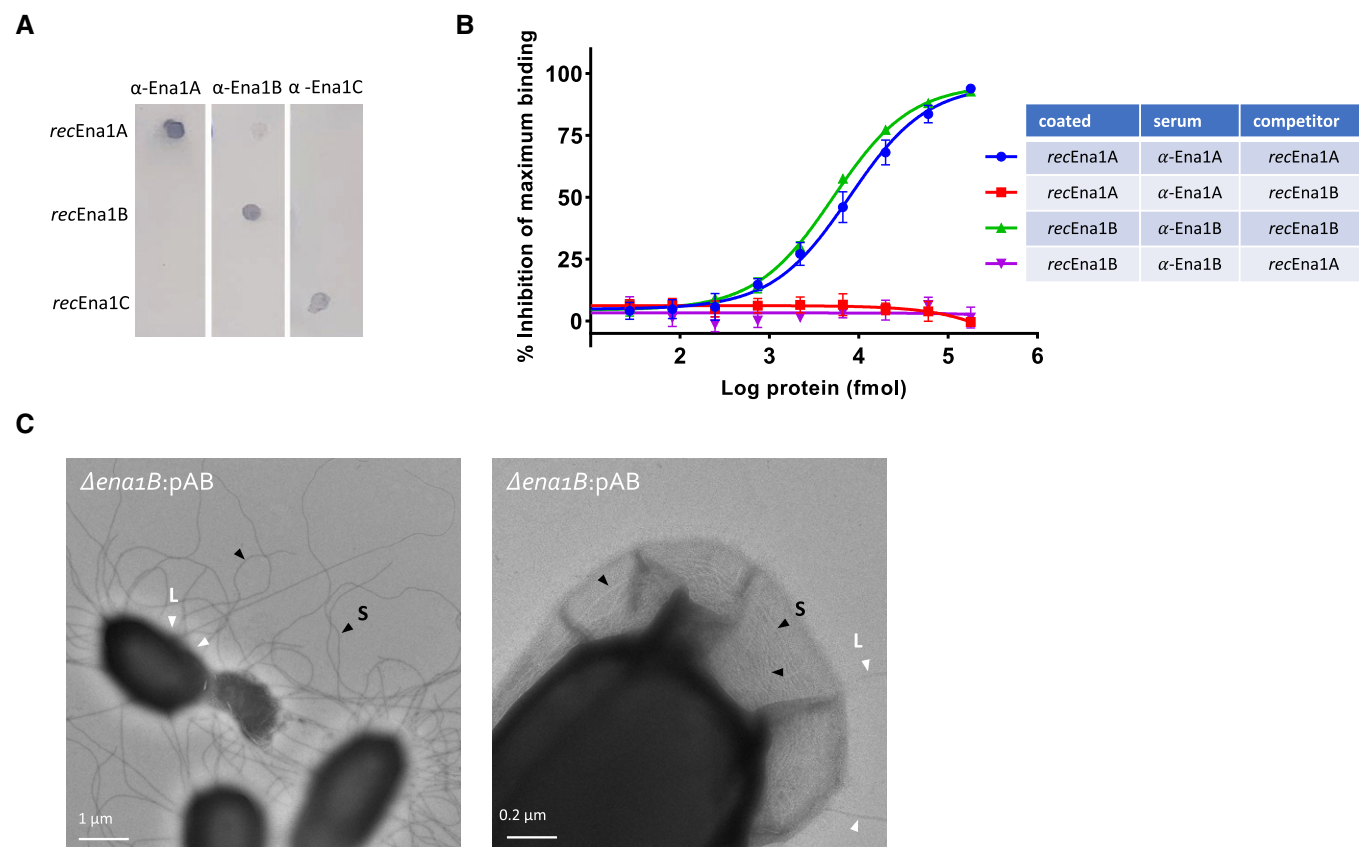

**Figure EV3. Ena1 sera and Ena1A–Ena1B overexpression.**

- A Evaluation of residual cross-reactivity in anti-Ena1A, anti-Ena1B, and anti-Ena1C sera by dot blot. 100 ng of purified *recEna1A*, *recEna1B*, or *recEna1C* was coated on PVDF membrane, blocked, washed, and probed with the three different anti-sera at 1:1,000 in TBST. Dot blot shows robust cognate binding with good selectivity against other Ena1 subunits.
- B Evaluation of residual cross-reactivity of anti-Ena1A and anti-Ena1B sera with *recEnaB* and *recEnaA* proteins, respectively, assayed using competitive ELISAs. The percentage inhibition of maximum binding was calculated using the formula  $(1-(S-B))/(MA-B) \times 100$ , where S, B, and MA are the average absorbance of the sample (sera + *recEna* competitor added to the *recEna*-coated wells), blank (only PBST added to the *recEna*-coated wells), and maximum activity (only sera added to the *recEna*-coated wells), respectively. The values presented are the averages of three independent experiments, and error bars depict  $\pm$ SD of the averages. The lines are regression curves from three-parameter logistic regression analyses (GraphPad prism version 9).
- C Negative stain TEM images of endospores of NVH 0075-95 mutant  $\Delta$ *ena1B* complemented with *pena1AB*. Complementation with *pena1AB* results in aberrantly long and numerous S-Ena (Fig 6). This overexpression of S-Ena results in the frequent rupture of the exosporium (left panel), or the encapsulated of the S-Ena into the exosporium (right panel). Selected S-Ena and L-Ena are labeled with black and with arrows, and labeled S and L, respectively.

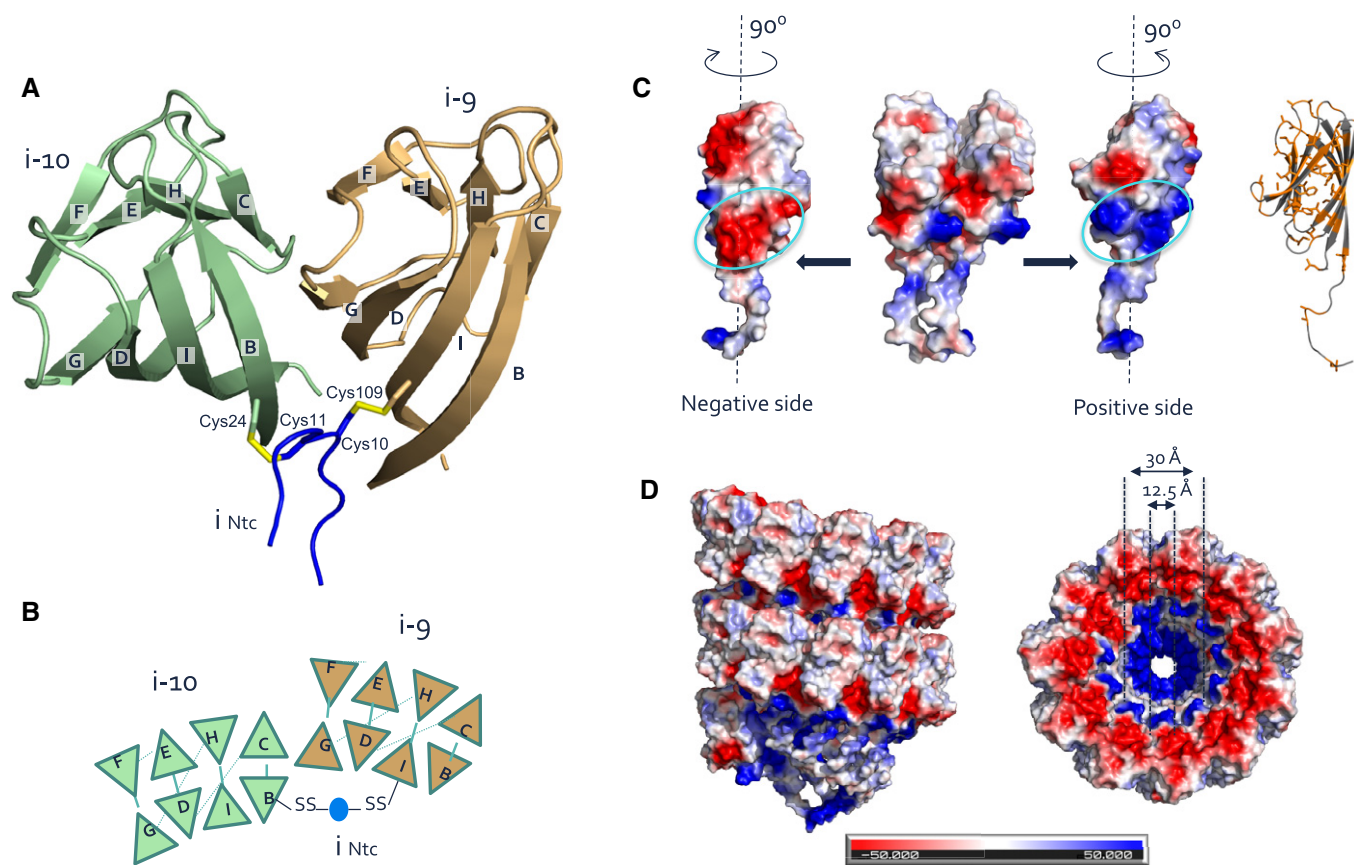

**Figure EV4. Inter-subunit interactions in S-Ena.**

- A, B Ribbon (A) and schematic (B) representation of lateral subunit-subunit contacts in S-Ena. Strand G of BIDG sheet of each subunit is augmented with strand C of CHEF  $\beta$ -sheet of the succeeding subunit. Both subunits are covalently cross-linked via the Ntc (blue) of a subunit located, respectively, 9 or 10 subunits above. Cys11 and Cys10 go into a disulfide bond with residues 24 in the B strand of subunit i-10 and Cys109 in strand I of subunit i-9.
- C, D Coulomb potential maps (calculated in PyMOL) of two adjacent subunits (C) and two helical turns of the S-Ena showing the distribution of charge on the atomic model surface. Each subunit possesses complementary positive and negatively charged patches of residues at the inter-subunit surface that are responsible for electrostatic stabilizing interactions between the subunits. Similarly, stacked helical rings in the S-Ena show a charge complementary interface (D).

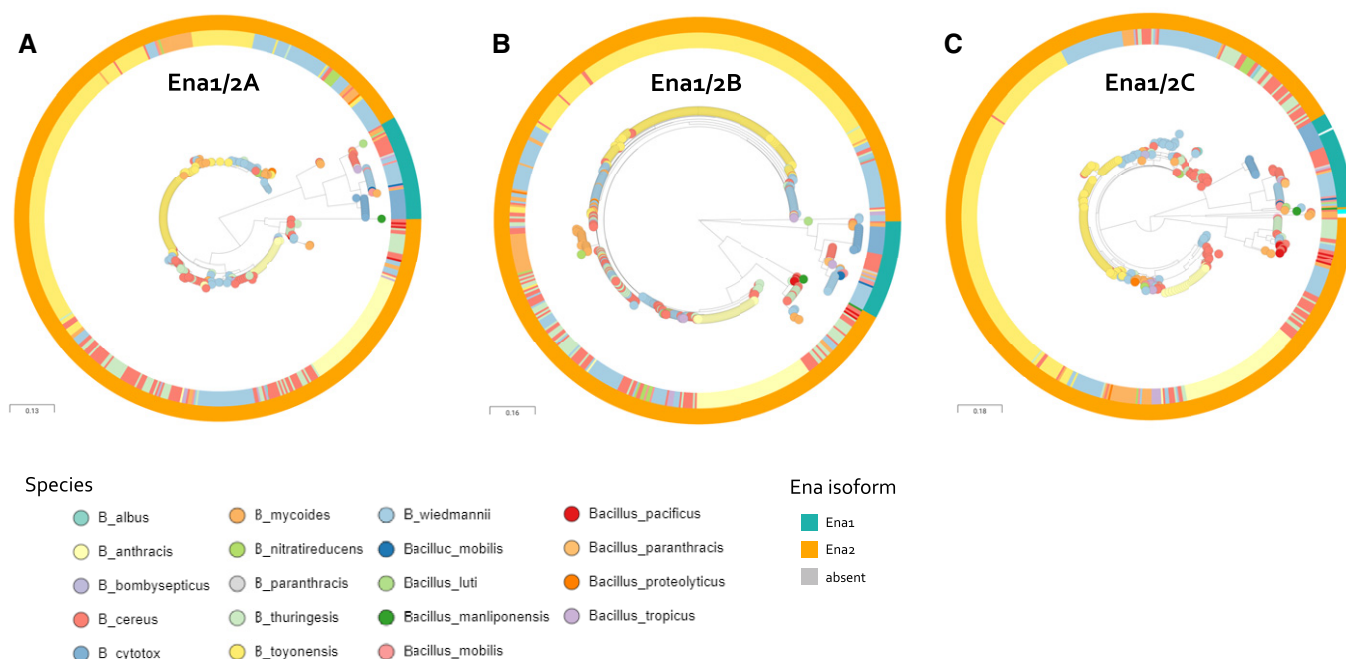

#### Figure EV5. Phylogenetic relationship between EnaA-C protein sequences among *Bacillus* spp.

Approximate likelihood trees generated by FastTree v.2.1.8 (Price *et al*, 2010), visualized in Microreact (Argimon *et al*, 2016). Trees are rooted on midpoint. Nodes are colored according to annotated species. See Methods for further details.

A Relationship between Ena1A and Ena2A isoforms of 593 isolates. Ena1A and Ena2A are defined as ortho- or homologues having >90% coverage and >80% and 50–65% sequence identity, respectively, with Ena1A\_GCF\_001044825; KMP91697.1 protein sequence defined in Appendix Table S5. Interactive tree accessible at: <https://microreact.org/project/5UixxY9vr2AVzXDVwa5t/1a8558fd>.

B Relationship between Ena1B and Ena2B isoforms of 591 isolates. Ena1B, Ena1B\_candidate, and Ena2B are defined as ortho- or homologues with > 90% coverage and > 80%, 60–80%, and 40–60% sequence identity to Ena1B\_NM\_Oslo protein sequence defined in Appendix Table S5, respectively. Interactive tree accessible at: <https://microreact.org/project/jj4pARvqf9gyT916sTar5u/1332f3b3>.

C Relationship between Ena1C and Ena2C isoforms of 591 isolates. Ena1C, Ena1C\_candidate, and Ena2C\_candidates are defined as ortho- or homologues with > 90% coverage and > 80%, 60–80%, and 40–60% sequence identity to Ena1C\_NM\_Oslo protein sequence defined in Appendix Table S5, respectively. Furthermore, isolates in which an ortho- or homologue was found elsewhere in the genome than the usual EnaA-B locus are colored cyan. Isolates that lacked an Ena1C homo- or orthologue are colored gray. Interactive tree accessible at: <https://microreact.org/project/aQaqCUCJoj2mw55KQujbGY/099d7885>.
