# Supplementary material
Source: PubMed Central journal article supplement (PMC8408608)
Supplement: EMBJ-40-e106887-s004.pdf [file EMBJ-40-e106887-s004.pdf]

## **Appendix**

### **A novel pilus superfamily from the endospores of pathogenic Bacilli.**

Brajabandhu Pradhan, Janine Liedtke, Mike Sleutel, Toril Lindbäck, Ephrem Debebe Zegeye, Kristin O'Sullivan, Ann-Katrin Llarena, Ola Brynildsrud, Marina Aspölm, Han Remaut

#### **Table of contents:**

Appendix Table S1 Cryo-EM model and data statistics

Appendix Table S2 Primers used in this work

Appendix Table S3 Genetic constructs used and generated in this study

Appendix Table S4 Overview of species included in the pairwise tBLASTn searches for the individual query proteins.

Appendix Table S5 Sequence and origin of query proteins used to search for homo- and orthologs within subject genomes in Appendix Table S4 using pairwise tBLASTn searches.

## 95 Appendix Table S1 Cryo-EM model and data statistics

|                                                     | <i>Ex vivo</i> S-Ena<br>(EMD- 11592)         | <i>rec</i> ENA1B (EMD-<br>11591)<br>(PDB 7A02) |
|-----------------------------------------------------|----------------------------------------------|------------------------------------------------|
| Data collection and processing                      | CryoARM300, BECM                             | CryoARM300, BECM                               |
| Magnification                                       | 60.000                                       | 60.000                                         |
| Voltage (kV)                                        | 300                                          | 300                                            |
| Electron exposure (e <sup>-</sup> /Å <sup>2</sup> ) | 62.5                                         | 64.66                                          |
| Defocus range (μm)                                  | -0.5 to -3.5                                 | -0.5 to -3.5                                   |
| Pixel size (Å)                                      | 0.82                                         | 0.784                                          |
| Symmetry imposed                                    | Helical<br>Rise= 3.22937<br>Rotation=31.0338 | Helical<br>Rise= 3.43721<br>Rotation=32.3504   |
| Initial particle images (no.)                       | 53501                                        | 100495                                         |
| Final particle images (no.)                         | 42822                                        | 65466                                          |
| Map resolution (Å)                                  | 3.2                                          | 3.05                                           |
| FSC threshold                                       | 0.143                                        | 0.143                                          |
| Map resolution range (Å)                            |                                              | 3.05-3.65 <sup>1</sup>                         |
| Refinement                                          |                                              |                                                |
| Initial model used                                  | NA                                           | de novo                                        |
| Model resolution (Å)                                | NA                                           | 2.81                                           |
| FSC threshold                                       | NA                                           | 0.143                                          |
| Model resolution range (Å)                          |                                              |                                                |
| Map sharpening <i>B</i> factor (Å <sup>2</sup> )    | 25.9 B-iso of density<br>modification        | 27.4 B-iso of density<br>modification          |
| Model composition                                   |                                              |                                                |
| Non-hydrogen atoms                                  | NA                                           | 18699 <sup>2</sup>                             |
| Protein residues                                    | NA                                           | 2576 <sup>2</sup>                              |
| Ligands                                             | NA                                           | 0                                              |
| <i>B</i> factors (Å <sup>2</sup> )                  |                                              |                                                |
| Protein                                             | NA                                           | 54.39                                          |
| Ligand                                              | NA                                           | NA                                             |
| R.m.s. deviations                                   |                                              |                                                |
| Bond lengths (Å)                                    | NA                                           | 0.008                                          |
| Bond angles (°)                                     | NA                                           | 0.736                                          |
| Validation                                          |                                              |                                                |
| MolProbity score                                    | NA                                           | 1.93                                           |
| Clashscore                                          | NA                                           | 8.07                                           |
| Poor rotamers (%)                                   | NA                                           | 0                                              |
| Ramachandran plot                                   |                                              |                                                |
| Favored (%)                                         | NA                                           | 101 (92%) <sup>3</sup>                         |
| Allowed (%)                                         | NA                                           | 9 (8%) <sup>3</sup>                            |
| Disallowed (%)                                      | NA                                           | 0 <sup>3</sup>                                 |

<sup>1</sup> Numbers reflect the density modified cryo-EM map calculated using ResolveCryoEM (Terwilliger et al., 2019)

<sup>2</sup> Numbers reflect a S-Ena model with 23 Ena1B protomers

<sup>3</sup> Numbers for a single Ena1B protomer

**Appendix Table S2** Primers used in this work. To allow assembly of the PCR fragments, primers B and C contain sequences overlapping each other (*italic*).

| Primer                  | Sequence (5'-3')                                      |                              |
|-------------------------|-------------------------------------------------------|------------------------------|
| <b>Deletion mutants</b> |                                                       | <b>Background strain</b>     |
| <b><i>Δena1A</i></b>    |                                                       |                              |
| A: 2184                 | AATGGCGCCAGTTCAATTAC                                  | <i>B. cereus</i> NVH 0075-95 |
| B: 2198                 | <i>CCTCTCTACATAGCCTTTCCCCTCTCTCTT</i>                 |                              |
| C: 2199                 | <i>AAGGCTATGTAGAGAGGGGAATTAGTAT</i>                   |                              |
| D: 2178                 | CCTCCTATTCTCCACCTGAAA                                 |                              |
| <b><i>Δena1B</i></b>    |                                                       |                              |
| A: 2164                 | TCCATGTGGTATGGCAAAAA                                  | <i>B. cereus</i> NVH 0075-95 |
| B: 2165                 | <i>CCATATATTACATACTAATTTCCCCTCTC</i>                  |                              |
| C: 2166                 | <i>AATTAGTATGTAATATATGGTGATTTAAAGATT</i>              |                              |
| D: 2167                 | AACCTACTTGCCCCTGTCCT                                  |                              |
| <b><i>Δena1C</i></b>    |                                                       |                              |
| A: 2200                 | CGCATCTTGTTTAGGTGCAA                                  | <i>B. cereus</i> NVH 0075-95 |
| B: 2201                 | <i>ATTTTTTGTATCCTTTTCATAAGACTGTTTAC</i>               |                              |
| C: 2202                 | <i>TGAAAAGGATAACAAAAAATTATTGCTTTTG</i>                |                              |
| D: 2176                 | AGGTGGAGGGACAATCCAAC                                  |                              |
| <b><i>Δena1AB</i></b>   |                                                       |                              |
| A: 2164                 | TCCATGTGGTATGGCAAAAA                                  | <i>B. cereus</i> NVH 0075-95 |
| B: 2186                 | <i>CCATATATTACATAGCCTTTCCCCTCTC</i>                   |                              |
| C: 2197                 | <i>AAAGGCTATGTAATATATGGTGATTTAAAGAT</i>               |                              |
| D: 2167                 | AACCTACTTGCCCCTGTCCT                                  |                              |
| <b><i>Δena1ABC</i></b>  |                                                       |                              |
| A: 2164                 | TCCATGTGGTATGGCAAAAA                                  | <i>B. cereus Δena1AB</i>     |
| B: 2202                 | <i>TGAAAAGGATAACAAAAAATTATTGCTTTTG</i>                |                              |
| C: 2201                 | <i>ATTTTTTGTATCCTTTTCATAAGACTGTTTAC</i>               |                              |
| D: 2200                 | CGCATCTTGTTTAGGTGCAA                                  |                              |
| <b>RT-PCR</b>           |                                                       | Gene                         |
| 2116/2117               | AAGTGCGTCTAATCAACAAGGAAA/ GGGAAATCTCCCATGAACACA       | <i>rpoB</i>                  |
| 2176/2177               | AGGTGGAGGGACAATCCAAC/ GCGAAACGTAATGAAATGC             | <i>ena1A</i>                 |
| 2174/2175               | CCACTGGAAGTAGCGCATCTT / GCCGCTGTCCAAGAATTGT           | <i>ena1B</i>                 |
| 2178/1279               | CCTCCTATTCTCCACCTGAAA / CTCCAGCGAACTCATTGGTAACT       | <i>ena1C</i>                 |
| 2180/2181               | GGGTGTACGAGGGTGATATGAATT/ TGTCGTTCCGCAAGTGTT          | <i>dedA</i>                  |
| <b>Complementation</b>  |                                                       | <b>Plasmid construct</b>     |
| 2220/2221               | GCGGATGTTGTTGGACAA/ACGTGCAAACACATGAATCG               | pHT315- <i>pena1AB</i>       |
| 2220/2222               | GCGGATGTTGTTGGACAA/ TCCATTTGCACAACATGAAAG             | pHT315- <i>pena1A</i>        |
| 2197/2185               | AAAGGCTATGTAATATATGGTGATTTAAAGAT/CGCATCTTGTTTAGGTGCAA | pHT315- <i>pena1C</i>        |

**Appendix Table S3** Constructs used and generated in this study.

| <i>Plasmids</i>                              |                                                                                                                                                                                                                                                                                                                                                                                                                                                  |                           |
|----------------------------------------------|--------------------------------------------------------------------------------------------------------------------------------------------------------------------------------------------------------------------------------------------------------------------------------------------------------------------------------------------------------------------------------------------------------------------------------------------------|---------------------------|
| <i>Name</i>                                  | <i>Details</i>                                                                                                                                                                                                                                                                                                                                                                                                                                   | <i>Reference</i>          |
| <i>pena1A</i>                                | pHT315:: <i>ena1A</i> (complementation of <i>B. cereus</i> $\Delta$ <i>ena1A</i> )                                                                                                                                                                                                                                                                                                                                                               | <i>this study</i>         |
| <i>pena1AB</i>                               | pHT315:: <i>ena1AB</i> (complementation of <i>B. cereus</i> $\Delta$ <i>ena1B</i> )                                                                                                                                                                                                                                                                                                                                                              | <i>this study</i>         |
| <i>pena1C</i>                                | pHT315:: <i>ena1C</i> (complementation of <i>B. cereus</i> $\Delta$ <i>ena1C</i> )                                                                                                                                                                                                                                                                                                                                                               | <i>this study</i>         |
| <i>pMAD-I-SceI</i>                           | Shuttle vector for making deletion mutant, carries I-SceI restriction site                                                                                                                                                                                                                                                                                                                                                                       | (Lindback et al., 2012)   |
| <i>pMAD<math>\Delta</math><i>ena1A</i></i>   | <i>pMAD-I-SceI</i> carrying DNA sequences flanking <i>ena1A</i>                                                                                                                                                                                                                                                                                                                                                                                  | <i>this study</i>         |
| <i>pMAD<math>\Delta</math><i>ena1B</i></i>   | <i>pMAD-I-SceI</i> carrying DNA sequences flanking <i>ena1B</i>                                                                                                                                                                                                                                                                                                                                                                                  | <i>this study</i>         |
| <i>pMAD<math>\Delta</math><i>ena1C</i></i>   | <i>pMAD-I-SceI</i> carrying DNA sequences flanking <i>ena1C</i>                                                                                                                                                                                                                                                                                                                                                                                  | <i>this study</i>         |
| <i>pMAD<math>\Delta</math><i>ena1AB</i></i>  | <i>pMAD-I-SceI</i> carrying DNA sequences flanking <i>ena1AB</i>                                                                                                                                                                                                                                                                                                                                                                                 | <i>this study</i>         |
| <i>pMAD<math>\Delta</math><i>ena1ABC</i></i> | <i>pMAD-I-SceI</i> carrying DNA sequences flanking <i>ena1ABC</i>                                                                                                                                                                                                                                                                                                                                                                                | <i>this study</i>         |
| <i>pBKJ233</i>                               | Express I-SceI enzyme                                                                                                                                                                                                                                                                                                                                                                                                                            | (Janes and Stibitz, 2006) |
| <i>pMS-BcE1A</i>                             | pET-28a(+) with CDS <i>recEna1A</i>                                                                                                                                                                                                                                                                                                                                                                                                              | <i>this study</i>         |
| <i>pMS-BcE1B</i>                             | pET-28a(+) with CDS <i>recEna1B</i>                                                                                                                                                                                                                                                                                                                                                                                                              | <i>this study</i>         |
| <i>pMS-BcE1C</i>                             | pET-28a(+) with CDS <i>recEna1C</i>                                                                                                                                                                                                                                                                                                                                                                                                              | <i>this study</i>         |
| <i>Proteins &amp; coding sequences</i>       |                                                                                                                                                                                                                                                                                                                                                                                                                                                  |                           |
| <i>recEna1A</i>                              |                                                                                                                                                                                                                                                                                                                                                                                                                                                  |                           |
| <b>Coding sequence</b>                       | ATGCATCACCATCACCATCACAGCAGCGGTGAAAATCTGTATTTTCAGGGCGCTTGTGAATGTAG CAGCACAGTCCTGACCTGTTGTTCCGGACAACCTCTAGTAATTTGTGCAGGATAAAAGTTTGC AAC CCTGGTCTTCCGCGGAAGCAAGCACTTTCACCGTATATGCGAACAAATGTTAACCAAAACATTGTC GGCACCGGCTATTTAACATATGATGTGGGGCCCGGTGTGAGCCCGGCCAACAGATTACGGTTAC GGTCTGGACTCCGGCGGGTACTATCCAGACCTTTCTGGTCAACGAAGGGACGTCTATCTCAT TTACCTTTCGCCGCTTTAACATTATTCAGATTACAACCCAGCCACACCGATTGGCACGTATCAG GGTGAATTTGCATCACGACCCGGTATTTAATGGCCTAA |                           |
| <b>Protein sequence</b>                      | MHHHHHHSSGENLYFQGACECSSTVLTCSSDNSSNFVQDKVCNPWSSAEASTFTVYANNVNQIVGTGYLT YDVGPGVSPANQITVTVLDSGGGIQTFLVNEGTSISFTFRRFNIIQITPATPIGTYQGEFCITRYLMA                                                                                                                                                                                                                                                                                                      |                           |
| <i>recEna1B</i>                              |                                                                                                                                                                                                                                                                                                                                                                                                                                                  |                           |
| <b>Coding sequence</b>                       | ATGCACCACCACCACCATCATTCTAGCGGTGAAAACCTGTACTTTCAGGGTAACTGCAGCACCAA TCTGTCATGCTGTGCCAATGGTCAGAAGACCATTGTCCAGGATAAAAGTCTGCATCGACTGGACCG CAGCCGCTACTGCAGCAATCATTTACGCTGATAATATCAGCCAAGACATCTACGCTTCAGGCTAT CTGAAAAGTGGATACAGGTACGGGTCCCGTGACCATCGTCTTTTACTCTGGTGGAGTCACAGGCAC CGCTGTGGAGACCATTGTGGTCGCCACGGGTTTCGTCGGCCAGCTTACGGTGCGCCGTTTTGATA CCGTCACTATTCTGGGCACCGCAGCAGCGGAGACTGGTGAGTTTTGTATGACCATCCGTTACACT TTGAGCTAA                          |                           |
| <b>Protein sequence</b>                      | MHHHHHHSSGENLYFQGNCSNLSCCANGQKTIVQDKVICIDWTAATAAIIYADNISQDIYASGYLKV DTGTGPVTIVFYSGGVTGTAVETIVVATGSSASFTVRRFDVTILGTAAAEETGEFCMTIRYTLS                                                                                                                                                                                                                                                                                                             |                           |
| <i>recEna1C</i>                              |                                                                                                                                                                                                                                                                                                                                                                                                                                                  |                           |

|                         |                                                                                                                                                                                                                                                                                                                                                                                                                                                                                                                                                            |
|-------------------------|------------------------------------------------------------------------------------------------------------------------------------------------------------------------------------------------------------------------------------------------------------------------------------------------------------------------------------------------------------------------------------------------------------------------------------------------------------------------------------------------------------------------------------------------------------|
| <b>Coding sequence</b>  | ATGCATCATCATCATCACCATTCCAGCGGTGAGAATCTCTATTTCCAAGGCAAACCGCACAAAA<br>TATCGGCTGCTTTGCGCCGCTCTCCATTATCTGCCAGCCGACCTGTCCGTGCCCGCCCAATTT<br>TACCGCCGGAACGCGGTGACGCCGAGCTGGTCACAAATGAATTTGCGGGGACATCTGATTAGC<br>AACGATTTTATTCCAATTAGCCAGAAACAGCTGAAACAAACAAACACCACCGTTAATATCTGGAA<br>AAACGACGGAATCGTTTTCCCTGAGCGGCACGATTTCAATTTATAATAATCGCAATTCGACCAACG<br>CGCTGTCGATTAGATTATCAGTAGTACGACCAATACCTTTACAGCGCTCCCGGGGAATACGATT<br>TCCTATACTGGTTTTGACCTGCAGTCCGTCTCTGTTATCGACATCCAAGCGATCCAAGTATCTA<br>CATTGAGGGCCGCTATTGTTTTCAGTTAACTTACTGTAAATCTAAACGCGATTGTCTTTAA |
| <b>Protein sequence</b> | MHHHHHHSSGENLYFQGKPHKNIGCFAPLSIICQPTCPPPPILPPERGDAELVTNEFAGDILISNDFIPISQKQL<br>KQNTTVNIWKNDGIVSLSGTISIYNNRSTNALSIIQISSTNTFTALPGNTISYTGFDLQSVSVIDIPSDPSIYIEG<br>RYCFQLTYCKSKRDCL                                                                                                                                                                                                                                                                                                                                                                            |

**Appendix Table S4** Overview of species included in the pairwise tBLASTn searches for the individual query proteins.

| Species                   | Number of genomes |
|---------------------------|-------------------|
| <i>B. albus</i>           | 1                 |
| <i>B. anthracis</i>       | 63                |
| <i>B. bombysepticus</i>   | 1                 |
| <i>B. cereus</i>          | 85                |
| <i>B. cytotoxicus</i>     | 14                |
| <i>B. manliponensis</i>   | 1                 |
| <i>B. gaemokensis</i>     | 2                 |
| <i>B. luti</i>            | 1                 |
| <i>B. mycoides</i>        | 33                |
| <i>B. mobilis</i>         | 5                 |
| <i>B. nitratireducens</i> | 6                 |
| <i>B. pacificus</i>       | 3                 |
| <i>B. paramycoides</i>    | 2                 |
| <i>B. paranthracis</i>    | 3                 |
| <i>B. pseudomycoides</i>  | 8                 |
| <i>B. proteolyticus</i>   | 1                 |
| <i>B. subtilis</i>        | 127               |
| <i>B. thuringiensis</i>   | 50                |
| <i>B. toyonensis</i>      | 204               |
| <i>B. tropicus</i>        | 7                 |
| <i>B. wiedmannii</i>      | 119               |
| <b>Total</b>              | <b>735</b>        |

**Appendix Table S5** Sequence and origin of query proteins used to search for homo- and orthologs within subject genomes in Table S4 using pairwise tBLASTn searches.

EnaX\_NM\_Oslo: Query protein sequence is sequenced from amplified lab strain.

EnaX\_GCF\_001044825: Query sequence protein is from the gene in the publicly available NVH 0095-75:

GCF\_001044825.1\_ASM104482v1. NM 0095-75

| <b>PCR product</b>                 |                                                                                                                                                                  |
|------------------------------------|------------------------------------------------------------------------------------------------------------------------------------------------------------------|
| Ena1B_NM_Oslo                      | MGNCSTNLSCCANGQIIVQDKVICDWTAATAAIIYADNISQDIYASGYLKVDTGTGPVTIVFYSGGVT<br>GTAVETIVVATGSSASFTVRRFDTVTILGTAAAETGEFCMTIRYTLS                                          |
|                                    |                                                                                                                                                                  |
| <b>From the GCF_001044825.1:</b>   |                                                                                                                                                                  |
| Ena1A_GCF_001044825,<br>KMP91697.1 | MACECSSTVLCCSDNSSNFVQDKVCNPWSSAEASTFTVYANNVNQNIVGTGYLTYDVGPGVSPANQ<br>ITVTVLDSGGGTIQFLVNEGTSISFTFRFNIQITTPATPIGTYQGEFCITRYLMA                                    |
| Ena1C_GCF_001044825,<br>KMP91699.1 | LKPHKNIGCFAPLSIICQPTCPCPPILPPERGDAELVTNEFAGDILISNDFIPISQKQLKQTNTTVNIWKN<br>DGIVSLSGTISIYNNRNSTNALSIIISSTNTFTALPGNTISYTGFDLQSVSVIDIPSDPSIYIEGRYCFQLTY<br>CKSKRDCL |

## References

- Argimon, S., Abudahab, K., Goater, R.J.E., Fedosejev, A., Bhai, J., Glasner, C., Feil, E.J., Holden, M.T.G., Yeats, C.A., Grundmann, H., *et al.* (2016). Microreact: visualizing and sharing data for genomic epidemiology and phylogeography. *Microb Genom* 2, e000093.
- Burnley, T., Palmer, C.M., and Winn, M. (2017). Recent developments in the CCP-EM software suite. *Acta Crystallogr D Struct Biol* 73, 469-477.
- Farabella, I., Vasishtan, D., Joseph, A.P., Pandurangan, A.P., Sahota, H., and Topf, M. (2015). TEMPy: a Python library for assessment of three-dimensional electron microscopy density fits. *J Appl Crystallogr* 48, 1314-1323.
- Price, M.N., Dehal, P.S., and Arkin, A.P. (2010). FastTree 2--approximately maximumlikelihood trees for large alignments. *PLoS One* 5, e9490.
- Terwilliger, T.C., Ludtke, S.J., Read, R.J., Adams, P.D., and Afonine, P.V. (2019). Improvement of cryo-EM maps by density modification. *bioRxiv*.
